# Supplementary material
Source: ML conference proceedings conference paper supplement (https://aclanthology.org/2026.semeval-1.153)

# Conspiracy Labels

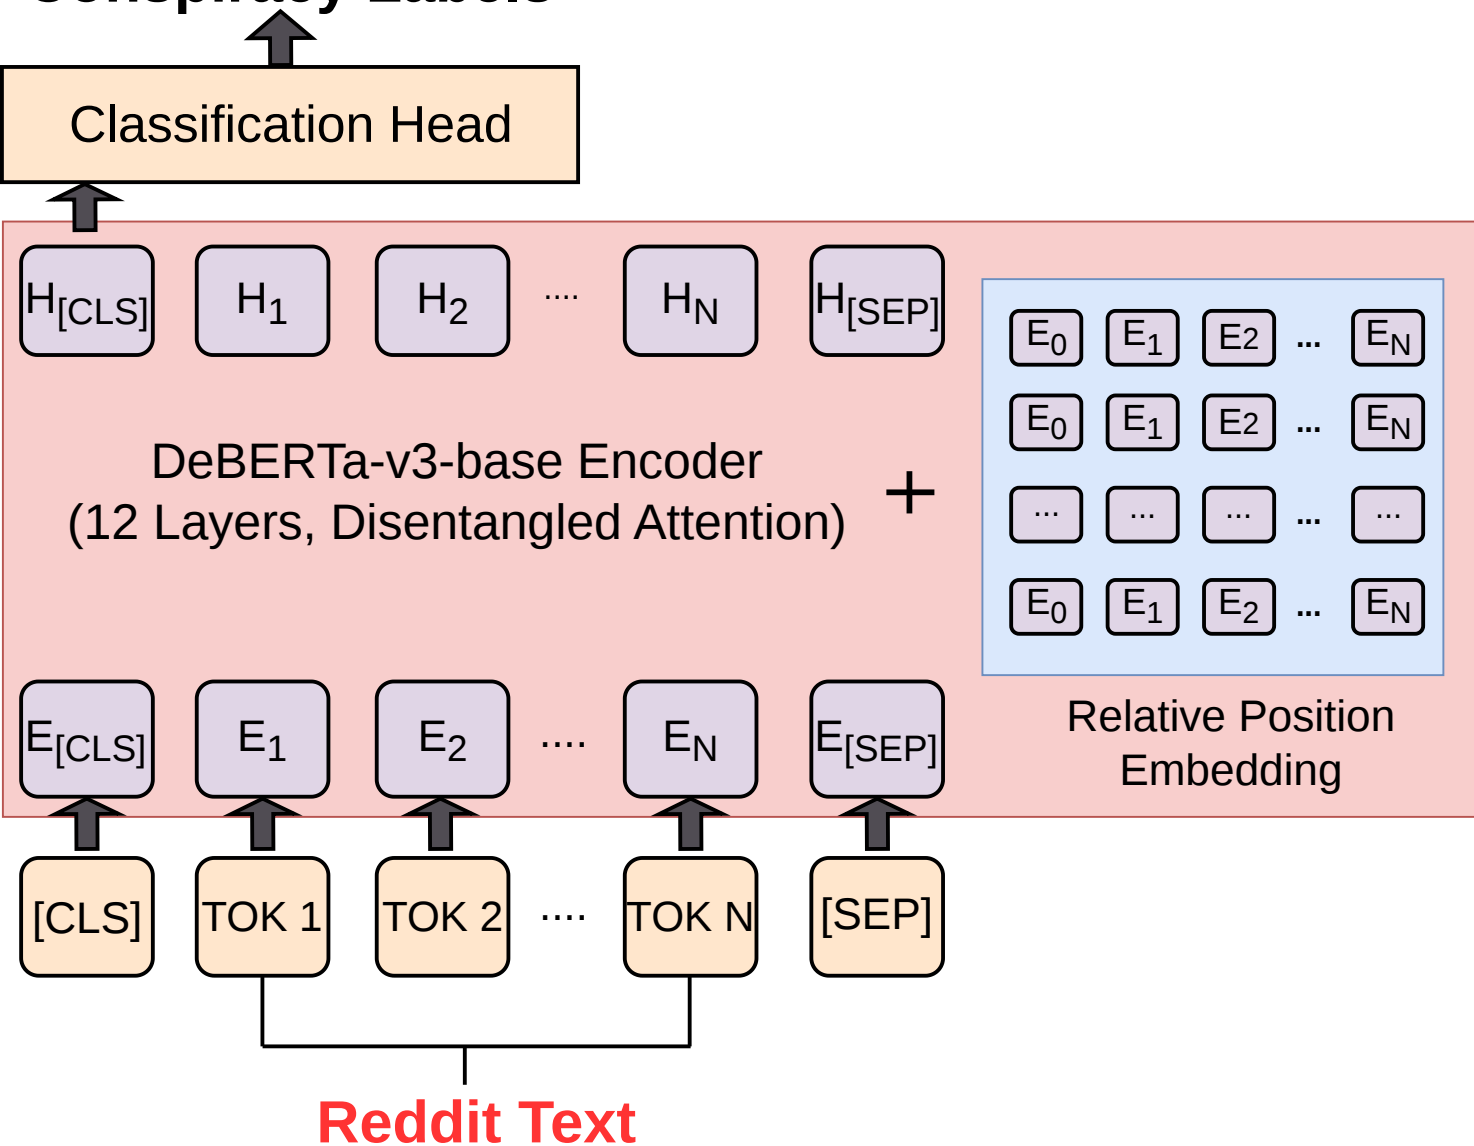

Supplement: SupplementaryMaterial [file DeBERTa-v3-base.pdf › latex/DeBERTa-v3-base.pdf]

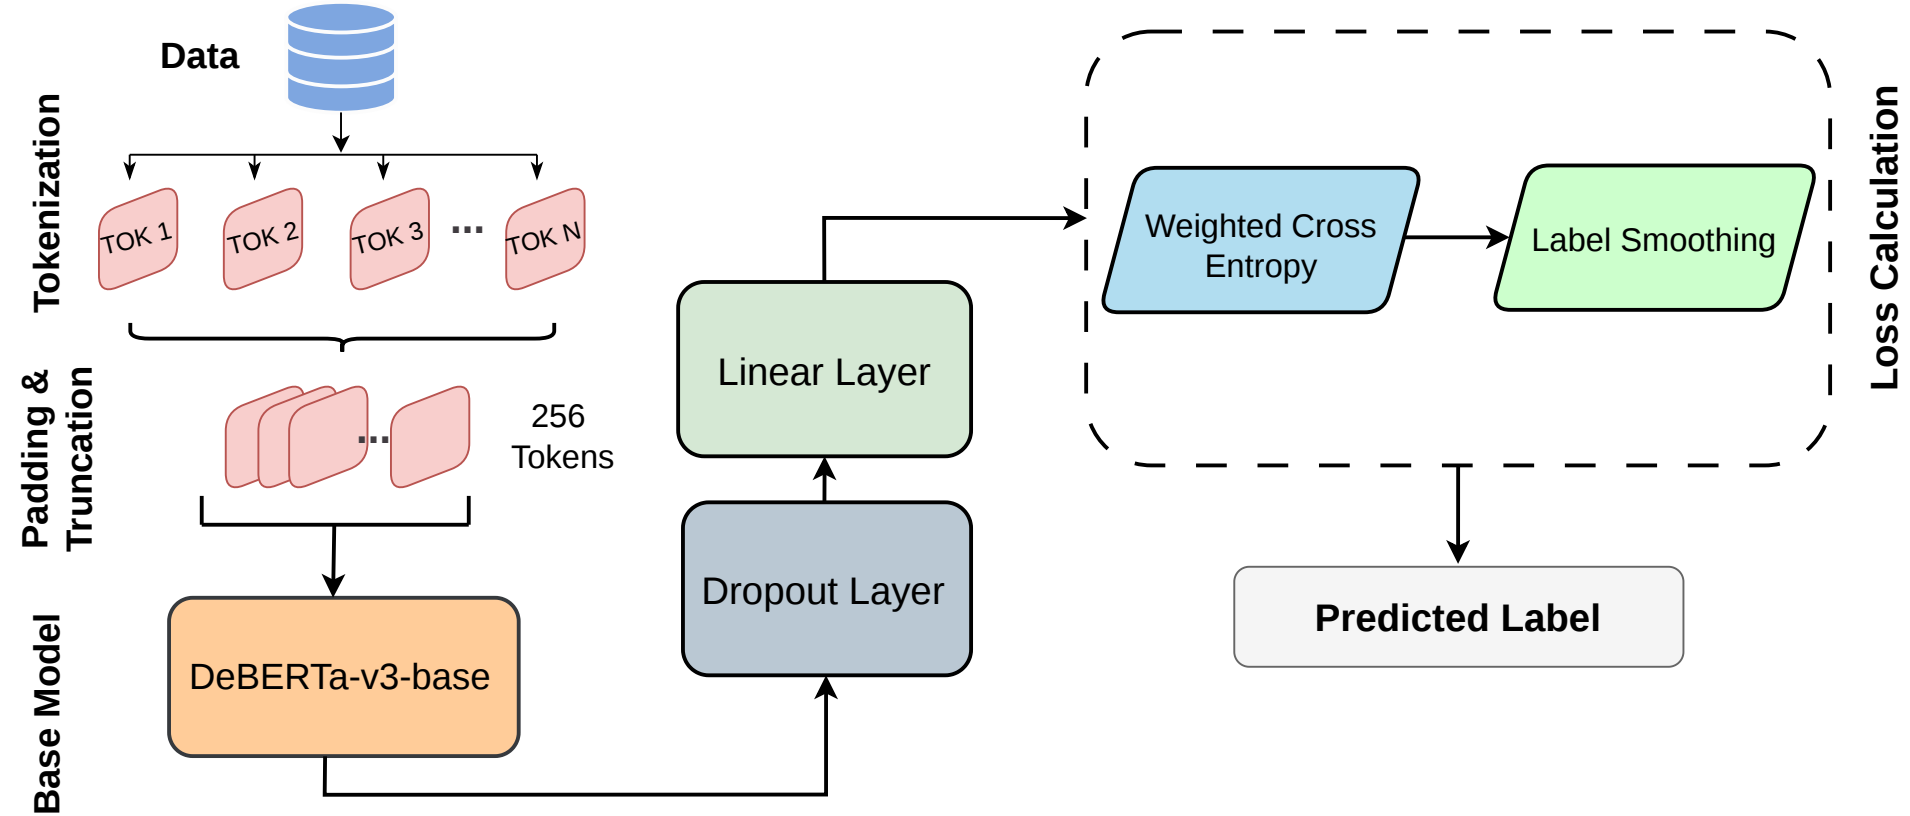

Supplement: SupplementaryMaterial [file Fine_tune_Flowchart.pdf › latex/Fine_tune_Flowchart.pdf]

Model F1 Scores on Test Set

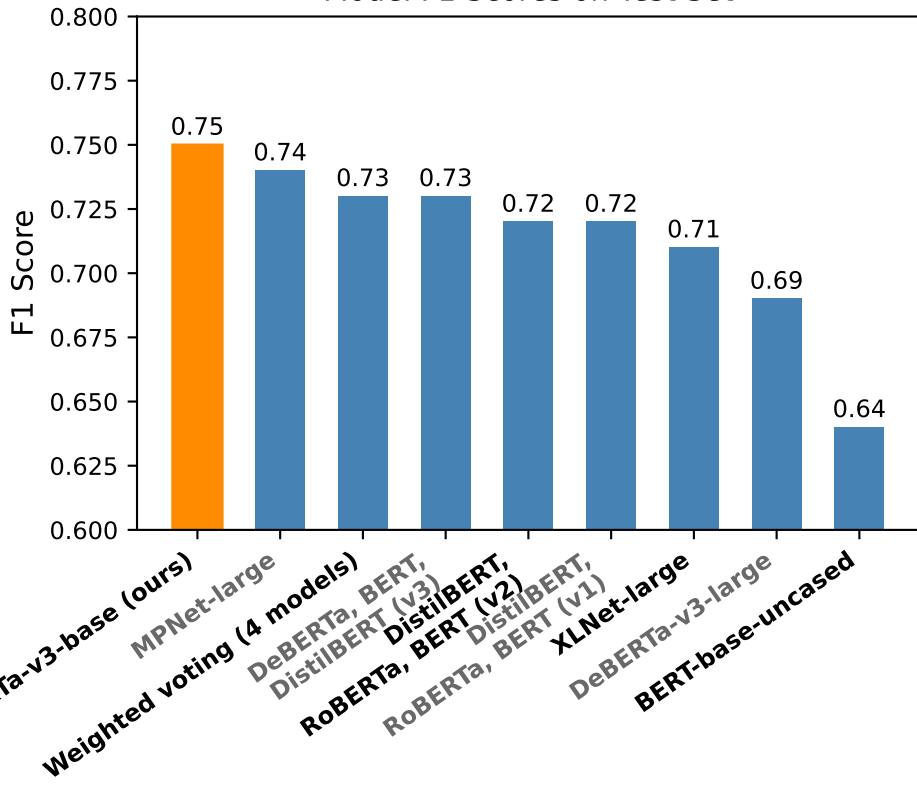

Supplement: SupplementaryMaterial [file model_f1_scores_bar.pdf › model_f1_scores_bar.pdf]
